# Supplementary material for: Can Nutritional Intervention for Obesity and Comorbidities Slow Down Age-Related Hearing Impairment?
Source: PubMed Central journal article supplement (PMC6682960; doi:10.3390/nu11071668), 2019-07-21
Supplement: nutrients-11-01668-s001.pdf [file nutrients-11-01668-s001.pdf]

| <b>Table S1</b> <b>Studies included in this review</b> |                                 |                            |                                              |                                                                                                                                        |                                |
|--------------------------------------------------------|---------------------------------|----------------------------|----------------------------------------------|----------------------------------------------------------------------------------------------------------------------------------------|--------------------------------|
| <b>Nutrient</b>                                        | <b>Study subjects</b>           | <b>Hearing test method</b> | <b>Study design</b>                          | <b>Main findings</b>                                                                                                                   | <b>Author and year</b>         |
| Low fat diet                                           | C57BL/6J mice<br>CBA/N-slc mice | ABR                        | Experimental<br>study design                 | High-fat food delays ARHI. The antioxidant of vitamin E is rich in the high fat diet.                                                  | Fujita et al.,<br>2015 [58]    |
|                                                        | Sprague-Dawley<br>rats          | ABR                        | Experimental<br>study design                 | High fat diet may induce oxidative stress, mitochondrial damage, and apoptosis in the inner ear which increases risk of ARHI.          | Du et al.,<br>2012 [55]        |
|                                                        | CBA/CaJ mouse                   | ABR,<br>DPOAEs             | Experimental<br>study design                 | Induction of diabetes significantly accelerates hearing impairment.                                                                    | Vasilyeva et al.,<br>2009 [56] |
|                                                        | CD/1 mice                       | ABR                        | Experimental<br>study design                 | Diet-induced obesity exacerbates hearing degeneration via increased hypoxia, inflammatory responses, and apoptosis signaling pathways. | Hwang et al., 2013<br>[57]     |
|                                                        | Humans<br>(aged ≥50 y)          | PTA                        | Retrospective<br>cross-sectional<br>analysis | Dietary intake of cholesterol is associated with progression of ARHI.                                                                  | Gopinath et al.,<br>2011 [59]  |
| Statins                                                | Humans<br>(aged ≥50 y)          | PTA                        | Retrospective<br>cross-sectional<br>analysis | Statins may have beneficial influence on preventing ARHI.                                                                              | Gopinath et al.,<br>2010 [74]  |

|                   |                                      |                        |                                                            |                                                                                                        |                                    |
|-------------------|--------------------------------------|------------------------|------------------------------------------------------------|--------------------------------------------------------------------------------------------------------|------------------------------------|
|                   | C57BL/6J mice<br>ApoE-deficient mice | ABR<br>DPOAEs          | Experimental<br>study design                               | Statins could slow down ARHI by improving blood flow of inner ear                                      | Syka et al.,<br>2007 [61]          |
| Aldosterone       | Humans<br>(aged ≥58y)                | PTA,<br>TEOAEs<br>HINT | Case control<br>study                                      | Serum aldosterone level is lower in ARHI. Aldosterone may have protective effect on ARHI.              | Tadros et al., 2005<br>[67]        |
|                   | CBA/CaJ mice                         | ABR                    | Experimental<br>study design                               | Protective effect of aldosterone on ARHI is via cellular stabilization in cochlear lateral wall cells. | Halonen et al.,<br>2016 [66]       |
| n-3 PUFAs         | C57BL/6J mice                        | ABR,<br>DPOAEs         | Experimental<br>study design                               | Long-term protective role of n-3 PUFAs on cochlear homocysteine metabolism and progression of ARHI.    | Martínez et al.,<br>2015 [73]      |
|                   | Humans<br>(aged ≥50 y)               | PTA                    | Cross-section<br>and longitudinal<br>prospective<br>design | n-3 PUFAs in the diet could be beneficial to preserve cochlear function and reduce ARHI.               | Gopinath et al.,<br>2010 [74]      |
|                   | Humans<br>(aged 50-70 y)             | PTA                    | Cross-section<br>and longitudinal<br>prospective<br>design | Inverse association between plasma very long-chain n-3 PUFAs and hearing loss.                         | Dullemeijer C et<br>al., 2010 [75] |
| Alpha-lipoic acid | Fischer rats                         | ABR                    | Experimental<br>study design                               | Alpha-lipoic acid repairs age-induced cochlea mitochondrial damage and reduces ARHI                    | Seidman et al.,<br>2005 [76]       |
| Lecithin          | Fischer rats                         | ABR                    | Experimental<br>study design                               | Lecithin may preserve cochlear mitochondrial function and reduced ARHI.                                | Seidman et al.,<br>2002 [78]       |

|         |                        |                       |                               |                                                                                         |                            |
|---------|------------------------|-----------------------|-------------------------------|-----------------------------------------------------------------------------------------|----------------------------|
| Tea     | Human<br>(aged ≥55 y)  | PTA                   | Retrospective<br>cohort study | Oolong tea drinking is associated with better central<br>auditory function in the aged. | Hwang et al.,<br>2012 [80] |
| Ginseng | C57BL/6 mice           | ABR                   | Experimental<br>study design  | Ginseng has protective effect on ARHI.                                                  | Tian et al.,<br>2014 [83]  |
|         | C57BL/ <u>KsJ</u> mice | ABR<br>AMLR<br>TEOAEs | Experimental<br>study design  | Ginseng could reduce hearing loss by improving insulin<br>sensitivity.                  | Hong et al.,<br>2013 [84]  |

ABR: auditory brainstem response; ARHI: age-related hearing impairment; DPOAEs: distortion product otoacoustic emissions; n-3 PUFA: omega-3 polyunsaturated fatty acids; HINT: Hearing in noise test; PTA: pure-tone audiometry; AMLR: auditory middle latency response; TEOAEs: transient evoked otoacoustic emissions
